# Supplementary material for: Multi-schema computational prediction of the comprehensive SARS-CoV-2 vs. human interactome
Source: PeerJ journal article supplement (doi:10.7717/peerj.11117), 2021-04-05

# Conceptual Overview of a PIPE4 Landscape & the Three Predicted Sites of Interaction (PIPE-Sites)

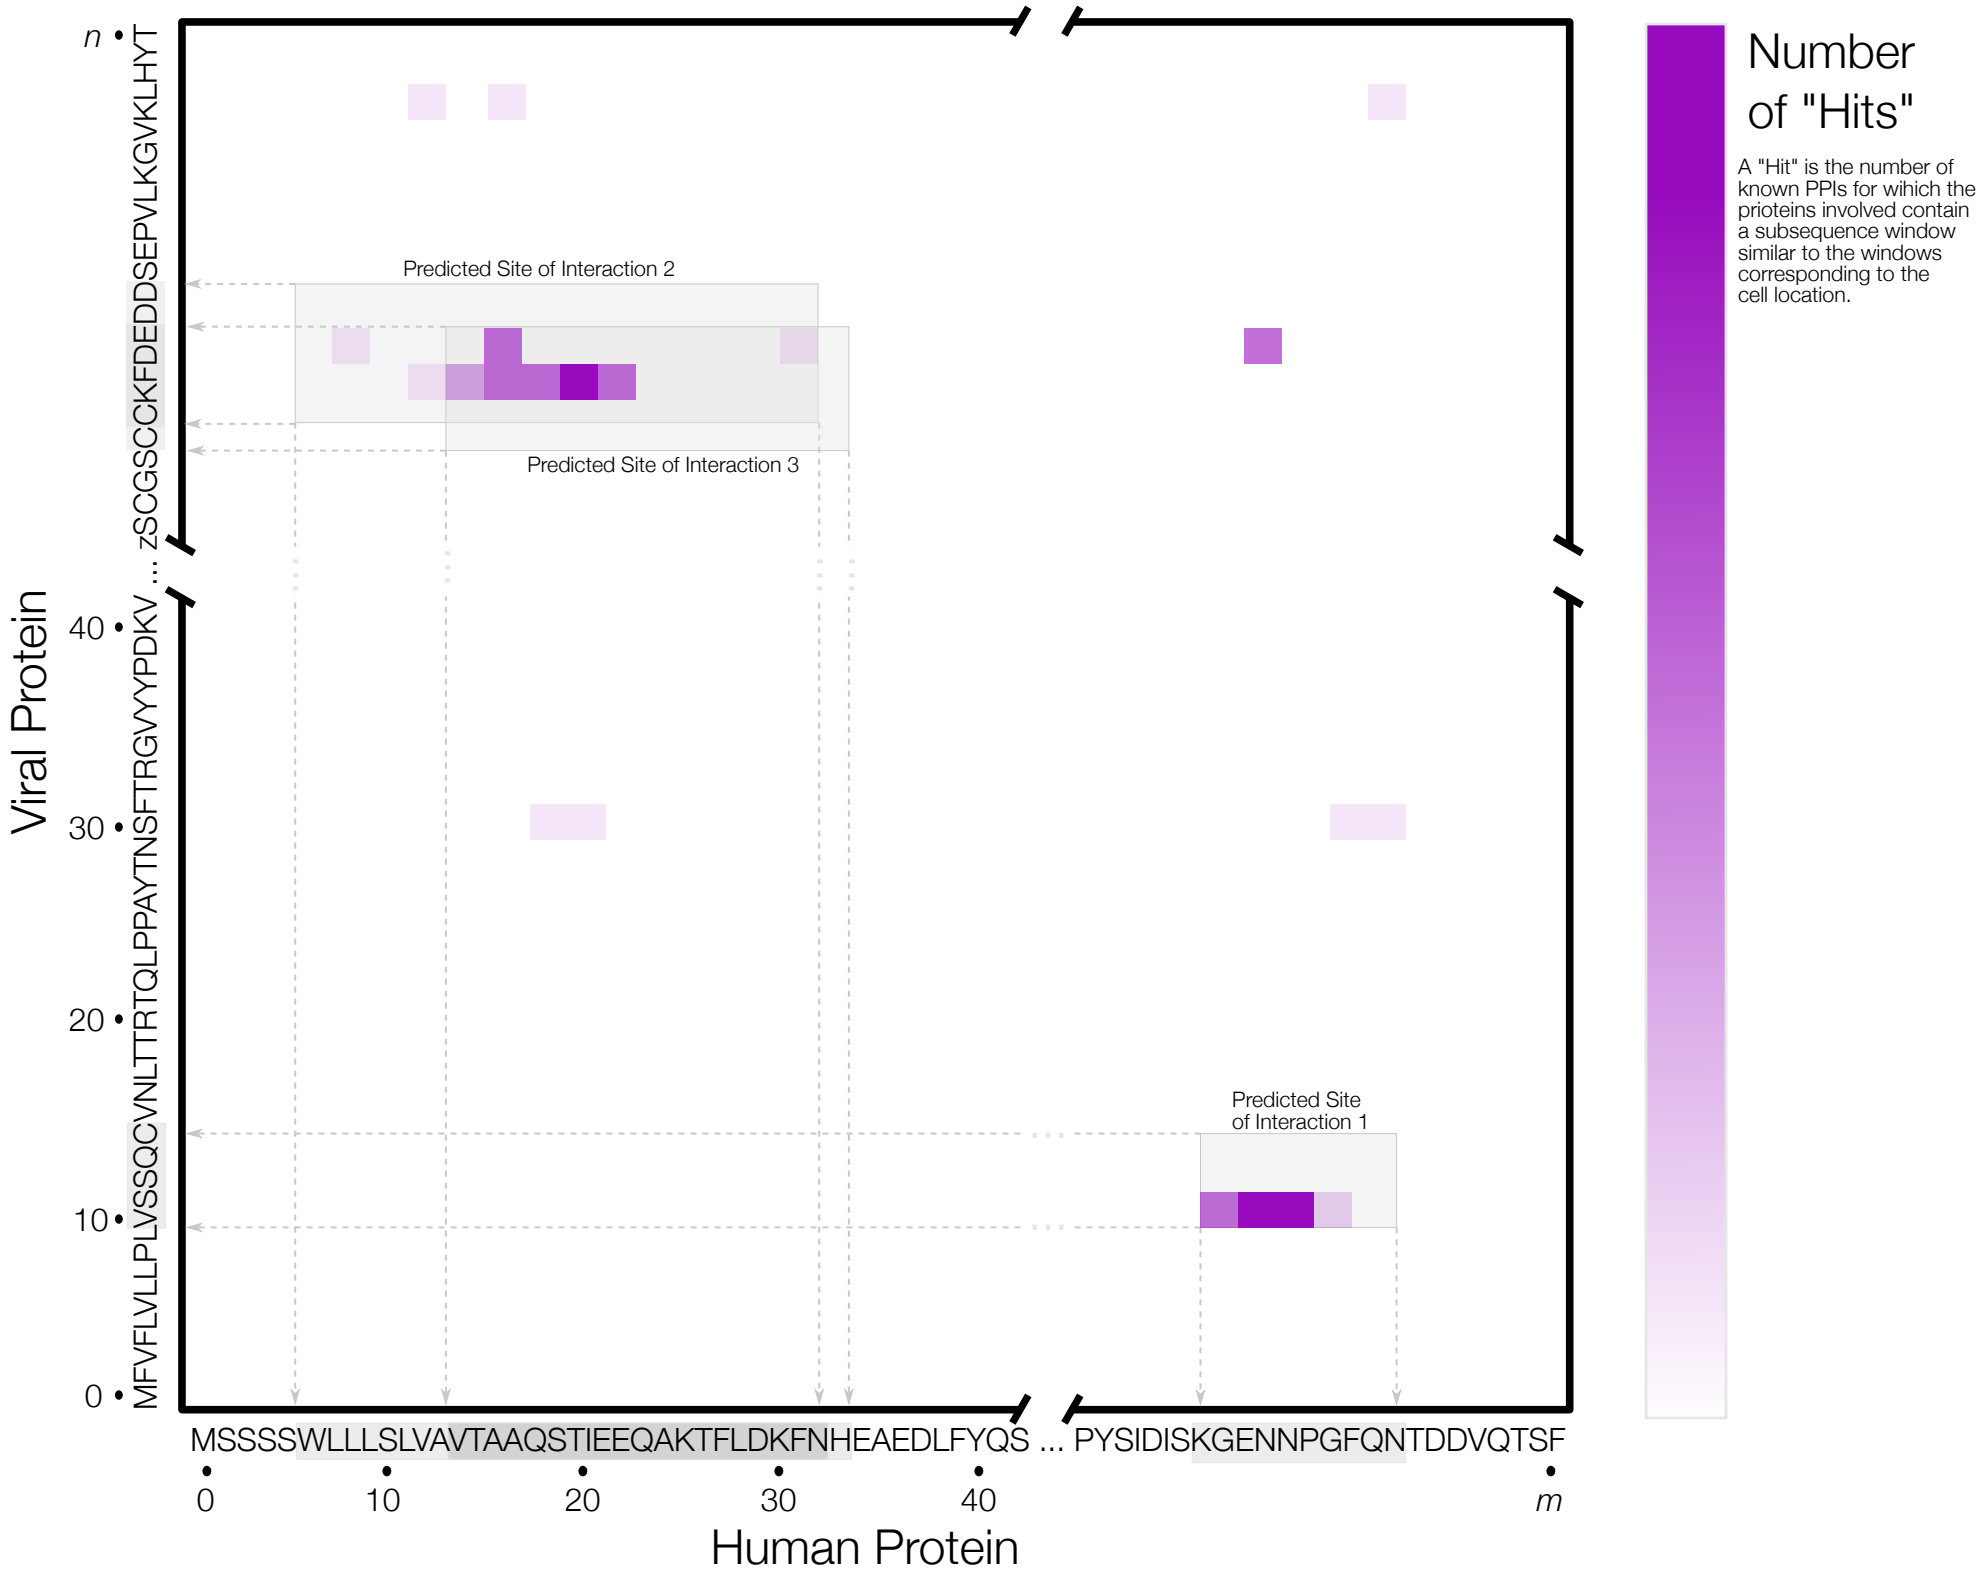

Supplement: supp-figure3.pdf [file supp-figure3.pdf]
